# Supplementary material for: Designing a novel tetradentate polyoxometalate eco-catalyst for the synthesis of β-aminocyclohexanone derivatives in water
Source: Royal Society of Chemistry journal article supplement (doi:10.1039/c8ra08259f), 2018-01-01
Supplement: c8ra08259f1.pdf [file c8ra08259f1.pdf]

## Designing a novel tetradentate polyoxometalate eco-catalyst for the synthesis of $\beta$ -aminocyclohexanone derivatives in water

Roya Mozafari<sup>a</sup>, Fariba Heidarizadeh<sup>\*a</sup>, Maedeh Azaroon<sup>a</sup>

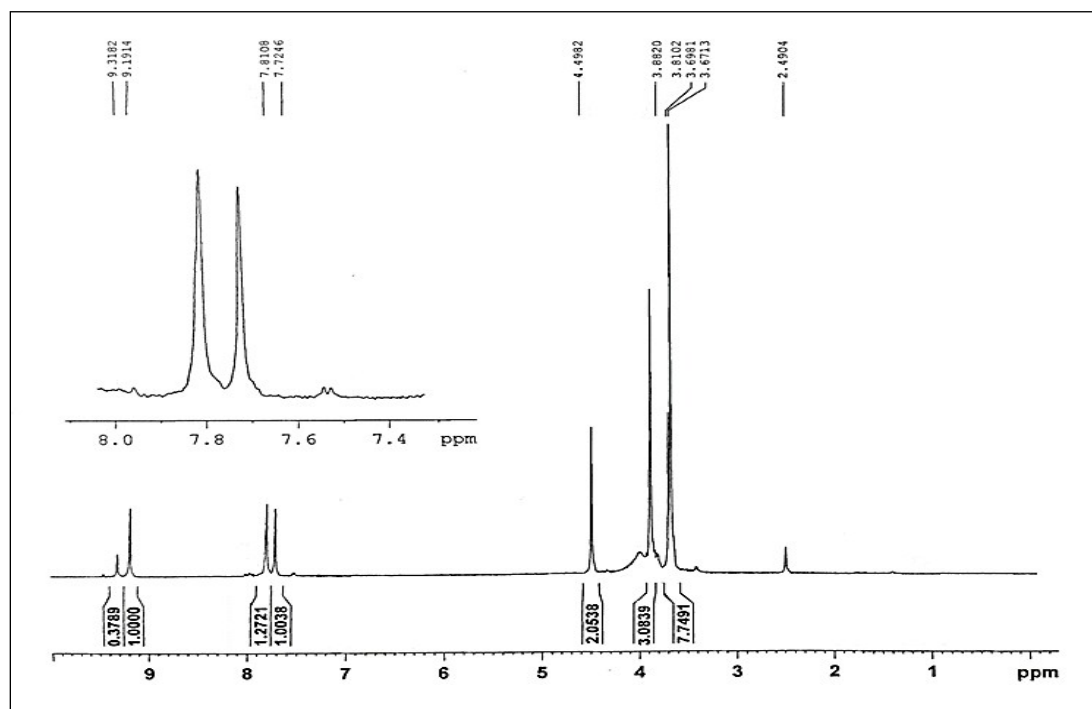

Figure 1. <sup>1</sup>H NMR of pentaerythryl tetramethylimidazolium bromide

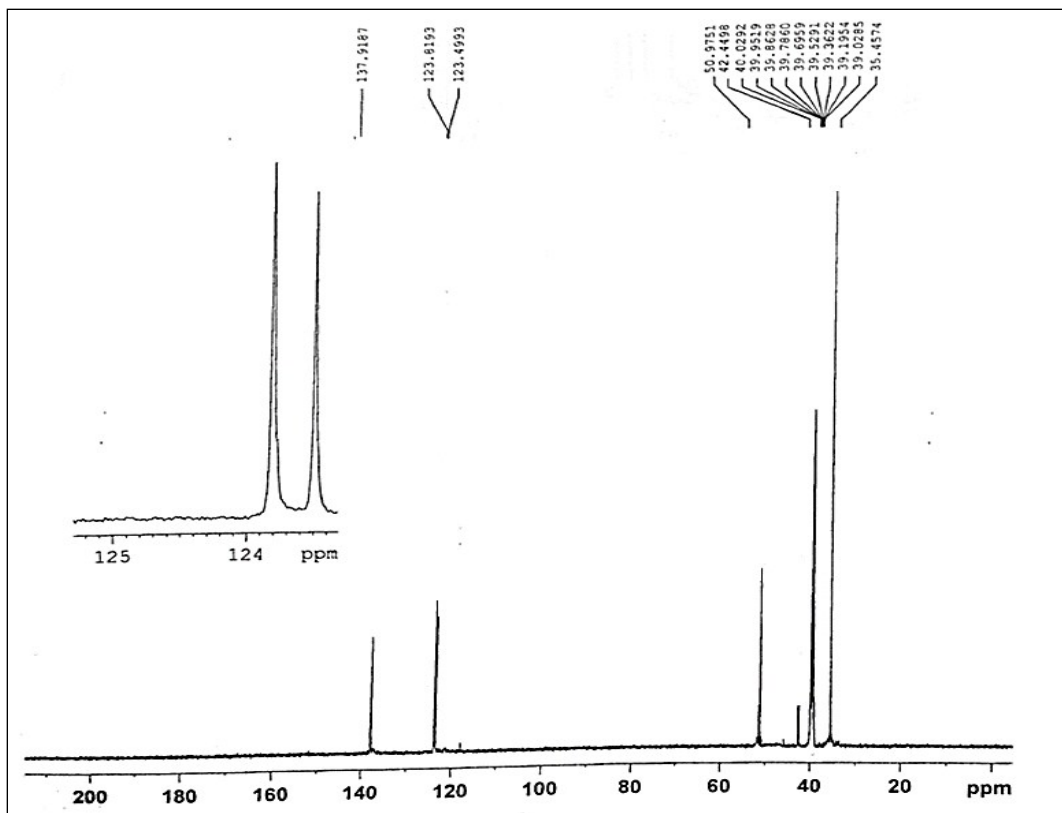

Figure 2.  $^{13}\text{C}$  NMR spectrum of pentaerythryl tetramethylimidazolium bromide

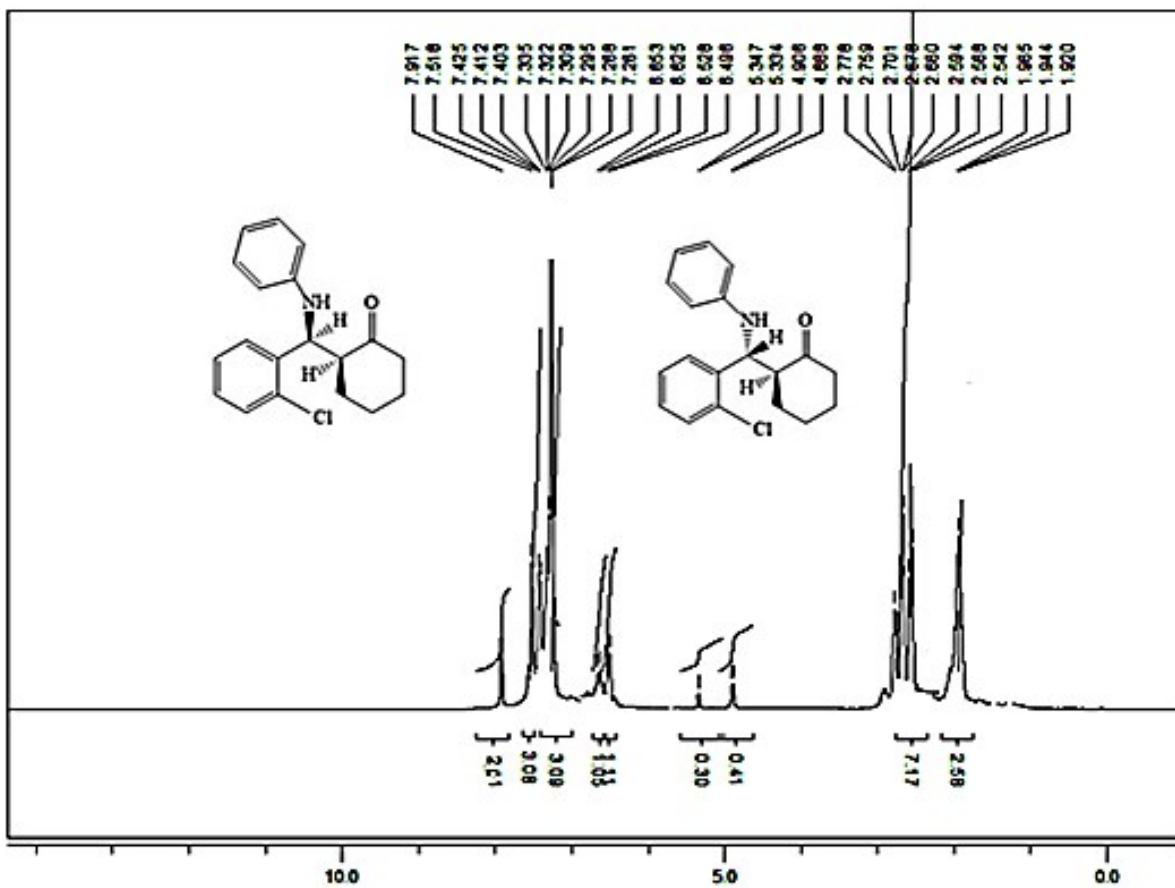

Figure 3. <sup>1</sup>H NMR spectrum of 2-((2-chlorophenyl)(phenylamino)methyl)cyclohexanone

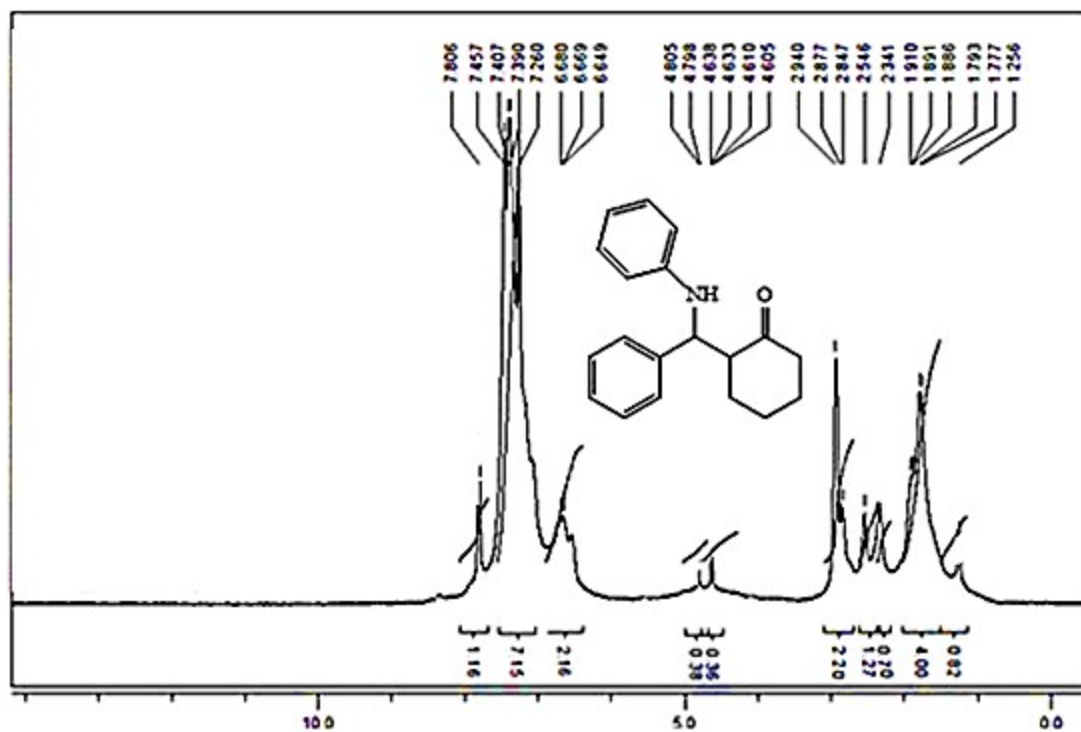

Figure 4. <sup>1</sup>H NMR spectrum of 2-(phenyl(phenylamino)methyl)cyclohexanone
